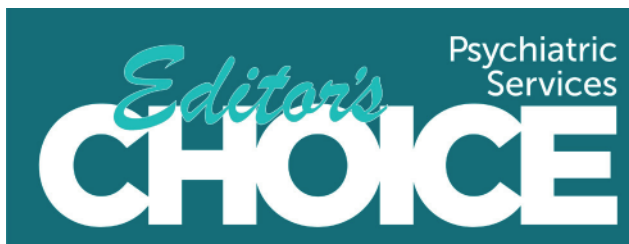

**Collections Editors: Carrie Cunningham, M.D., M.P.H., Nicole Kozloff, M.D., and Andrew D. Carlo, M.D., M.P.H.**

**Visit [psychiatryonline.org/ps/editorschoice](https://psychiatryonline.org/ps/editorschoice)**

Editor Lisa Dixon and the journal's Early Career Psychiatrist Advisory Committee offer a rich variety of Editor's Choice curated collections from the ample resource of articles published in *Psychiatric Services*.

### **2025**

- Mental Health Care for American Indian and Alaska Native Youths

### **2024**

- Intellectual and Developmental Disabilities
- Mental Health Care for Veterans
- The Imperative to Treat Tobacco Use Disorder
- Assertive Community Treatment
- Mental Health and Substance Use Disorder Parity

### **2023**

- Correctional Psychiatry
- 988 and the Crisis Continuum of Care
- Substance Use Disorders Refresh: Nonopioid Substance Use Disorders
- Responding to the Opioid Crisis
- Global Mental Health
- Mental Health of College Students

### **2022**

- Decision Science and Health Economics
- Supported Employment for Individuals With Mental Disorders
- Refugee Mental Health
- Engagement in Mental Health Services
- Integrated Care Refresh, Part 2
- Engaging People with Lived Experience in Mental Health Services and Research
- Trauma and Serious Mental Illness

### **2021**

- Racial-Ethnic Disparities in Mental Health Care
- Homelessness and Mental Health: Part 1
- Homelessness and Mental Health: Part 2. The Impact of Housing Interventions
- The Psychiatric Workforce Shortage

- The Stigma of Addiction
- Adolescent Suicide
- Mobile Interventions
- Mental Health and COVID-19
- Perinatal Psychiatry
- Integrated Care Refresh

### **2020**

- Health Disparities Among People With Serious Mental Illness
- Considerations for Telepsychiatry Service Implementation in the Era of COVID-19
- Resilience
- Mental Health Services in Rural Areas
- Suicide Prevention, Part 1: Identifying and Predicting Risk, Vulnerable Populations, Public Perceptions, and Priority Settings
- Suicide Prevention, Part 2: Evidence-Based Practices, Cost-Effectiveness, and Future Directions

### **2019**

- Integrated Care
- Recovery
- Peer Support
- Perinatal Psychiatry
- Asking for Change: Homelessness and Mental Health
- Mental Health Disparities by Race and Ethnicity of Adults
- Substance Use Disorders
- A Stitch in Time: Early Psychosis Intervention
- Mental Health Criminal Justice Diversion
- Community-Based Mental Health Crisis Services
- Family Members and Caregivers
- Violence and Mental Illness

AMERICAN  
**PSYCHIATRIC**  
ASSOCIATION  

---

**PUBLISHING**

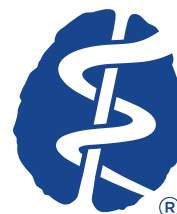

Source: https://psychiatryonline.org/doi/suppl/10.1176/ps.2025.76.issue-2/suppl_file/front.pdf
